# Supplementary material for: Tr-milRNA1 Contributes to Lignocellulase Secretion under Heat Stress by Regulating the Lectin-Type Cargo Receptor Gene Trvip36 in Trichoderma guizhouence NJAU 4742
Source: MDPI journal article supplement (doi:10.3390/jof7120997), 2021-11-23
Supplement: s1 [file s1]

## Supplementary Materials

**Figure S1. Knockout or over-expression of *Tr*-miRNAs and genes in NJAU 4742.** (a) Schematic diagram for *Tr*-miRNAs or genes disruption through double crossover recombination; (b) Schematic diagram for the over-expression of *Tr*-miRNAs; (c) Schematic diagram for gene over-expression; (d) Analysis of the expression level of *Tr*-miRNA relative to 18S in wt and OE-*Tr*-miRNA1 strains determined by qPCR. (e) Analysis of expression level of *Trvip36* gene relative to *Tef* in wt and OE-*Trvip36* strain determined by qPCR. Data were calculated from three biological replicates. Error bars represent  $\pm$  SDs. \* $P < 0.05$ , \*\* $P < 0.01$ , \*\*\* $P < 0.001$ . P-value  $< 0.05$  is regarded as statistically significant. The expression values are normalized to wt; (f-g) Verification of  $\Delta Tr$ -miRNA1 (f),  $\Delta Trvip36$  (g), wt-*egl*-GFP,  $\Delta Trvip36$ -*egl*-GFP, wt-*cbh*-GFP and  $\Delta Trvip36$ -*cbh*-GFP (h) mutants by PCR to verify homologous recombination.

**Figure S2. Diagram of construction principle for prepaing the mutants of lignocellulases-eGFP fusion strains.** Arm1 and Arm2 were used as two arms of homologous recombination and *Hygb* gene was used as the biomaker for screening.

**Figure S3. GO (a) and KEGG (b) enrichment of candidate *Tr*-miRNAs target genes.**

**Figure S4. The average intensity of EGL-GFP and CBH-GFP fluorescence in the ER and Golgi apparatus of wt and  $\Delta Trvip36$  after staining hyphae with ER-Tracker™ and BODIPY™ TR Ceramide, as markers of ER and Golgi compartments.** Data were calculated from all valid pixels in the ER and Golgi apparatus, and error bars represent  $\pm$  SEs. \* $P < 0.05$ , \*\* $P < 0.01$ , \*\*\* $P < 0.001$ . A P value  $< 0.05$  was regarded as statistically significant and ns refers to no significance.

**Table S1. All PCR primers used in this study.**

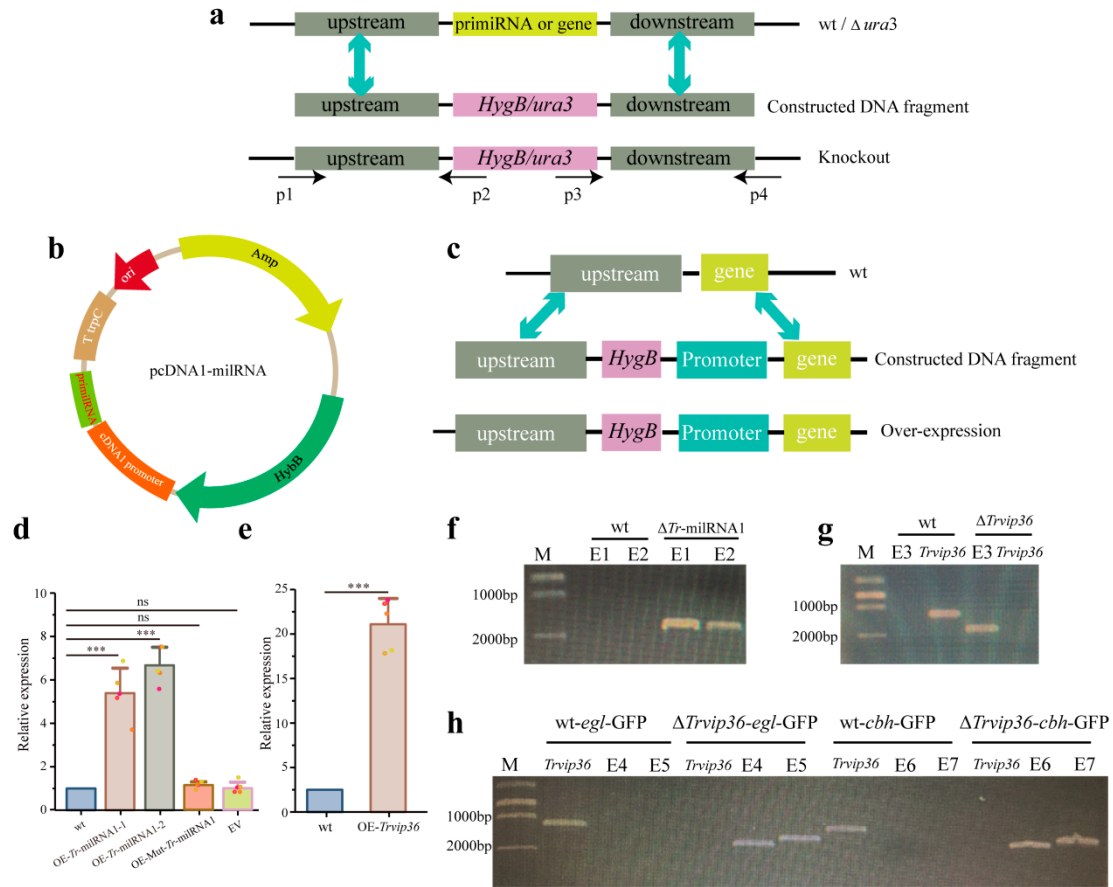

**Figure S1.** Knockout or over-expression of Tr-miRNAs and genes in NJAU 4742. (a) Schematic diagram for Tr-miRNAs or genes disruption through double crossover recombination; (b) Schematic diagram for the over-expression of Tr-miRNAs; (c) Schematic diagram for gene over-expression; (d) Analysis of the expression level of Tr-miRNA relative to 18S in wt and OE-Tr-milRNA1 strains determined by qPCR. (e) Analysis of expression level of Trvip36 gene relative to Tef in wt and OE-Trvip36 strain determined by qPCR. Data were calculated from three biological replicates. Error bars represent  $\pm$  SDs. \* $P < 0.05$ , \*\* $P < 0.01$ , \*\*\* $P < 0.001$ . P-value  $< 0.05$  is regarded as statistically significant. The expression values are normalized to wt; (f-g) Verification of  $\Delta Tr$ -milRNA1 (f),  $\Delta Trvip36$  (g), wt-egl-GFP,  $\Delta Trvip36$ -egl-GFP, wt-cbh-GFP and  $\Delta Trvip36$ -cbh-GFP (h) mutants by PCR to verify homologous recombination.

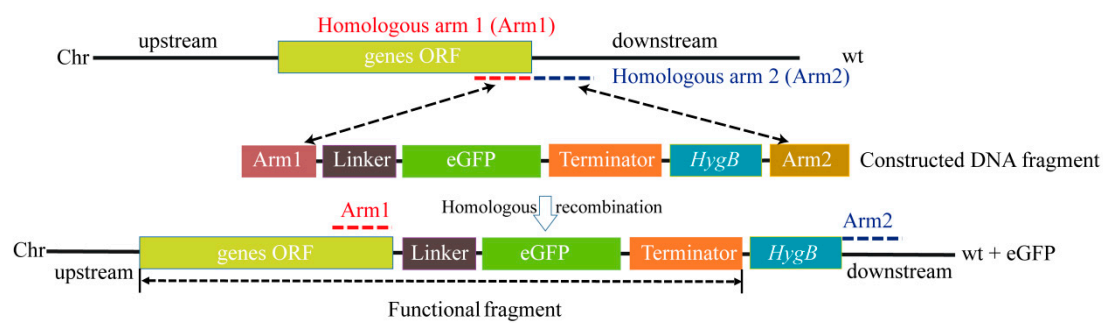

**Figure S2.** Diagram of construction principle for preparing the mutants of lignocellulases-eGFP fusion strains. Arm1 and Arm2 were used as two arms of homologous recombination and HygB gene was used as the biomaker for screening.

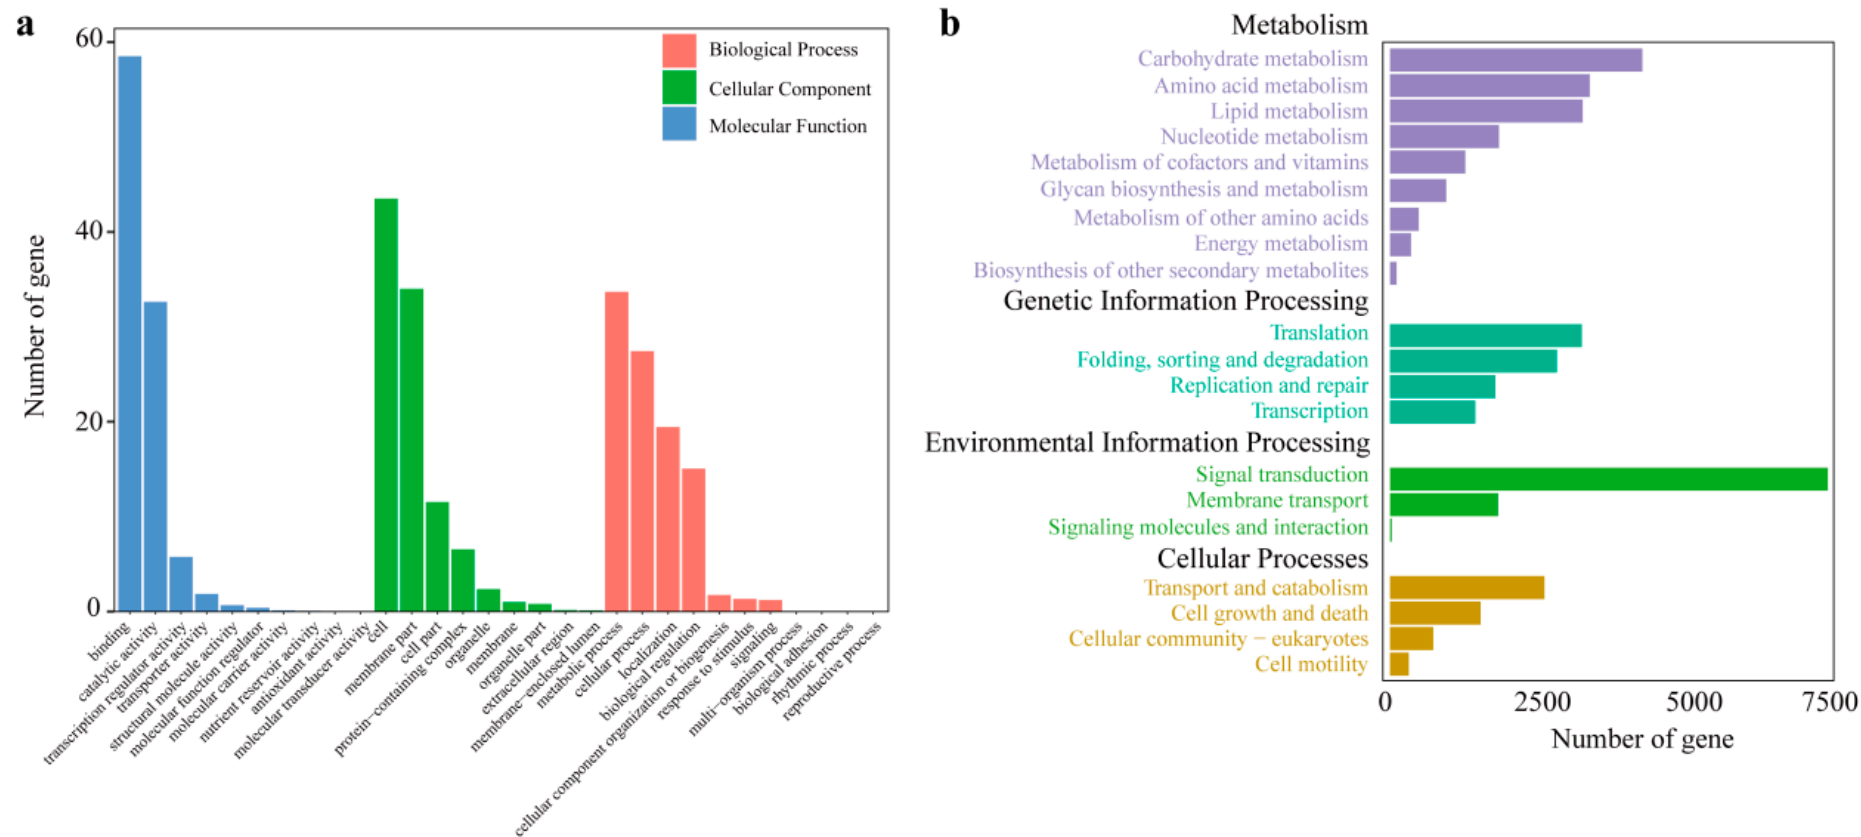

**Figure S3.** GO (a) and KEGG (b) enrichment of candidate Tr-miRNAs target genes.

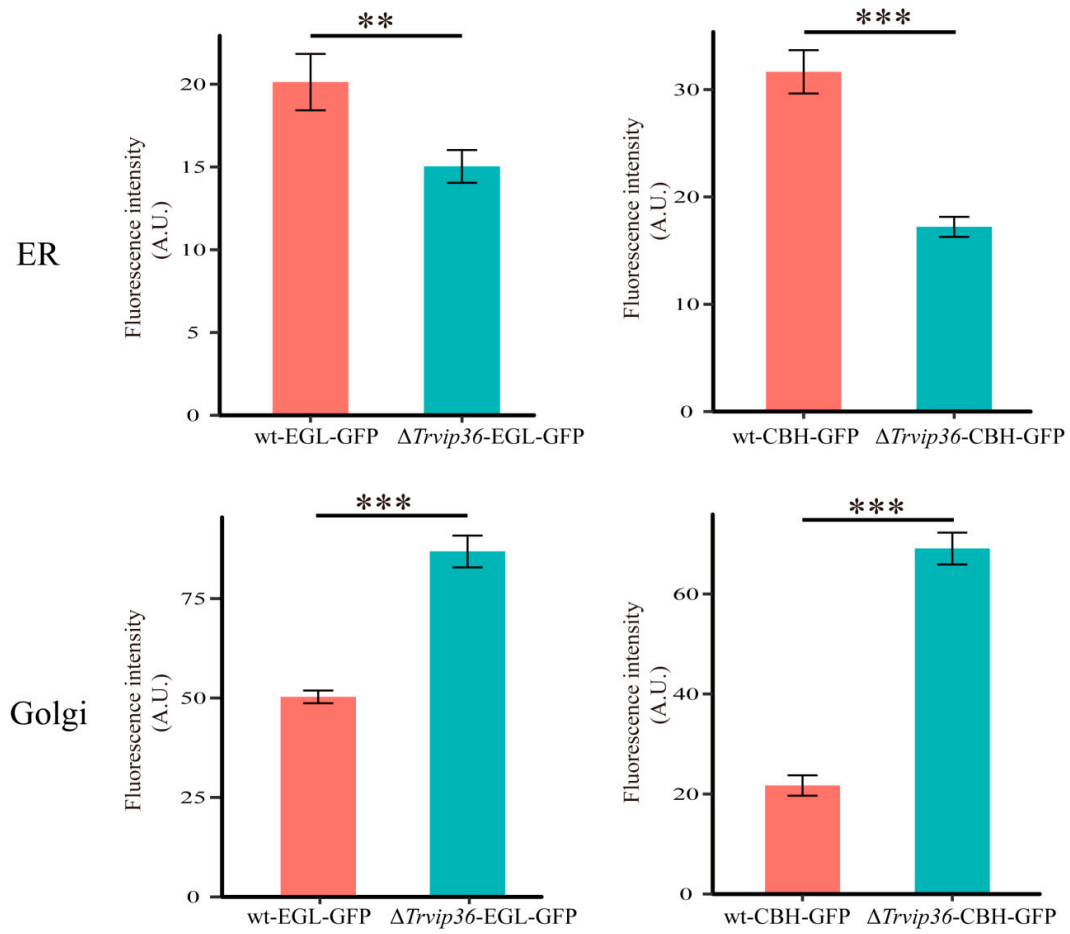

**Figure S4.** The average intensity of EGL-GFP and CBH-GFP fluorescence in the ER and Golgi apparatus of wt and  $\Delta Trvip36$  after staining hyphae with ER-Tracker™ and BODIPY™ TR Ceramide, as markers of ER and Golgi compartments. Data were calculated from all valid pixels in the ER and Golgi apparatus, and error bars represent  $\pm$  SEs. \* $P < 0.05$ , \*\* $P < 0.01$ , \*\*\* $P < 0.001$ . A  $P$  value  $< 0.05$  was regarded as statistically significant and ns refers to no significance.

**Table S1.** All PCR primers used in this study.

| Primers                                                                                            | Sequence (5' - 3')                                 |
|----------------------------------------------------------------------------------------------------|----------------------------------------------------|
| <b>Primers for <math>\Delta Tr</math>-miRNA1 construction and verification</b>                     |                                                    |
| E- <i>Tr</i> -miRNA1 (p1)                                                                          | TGGTCGAGGCGAGAGGTCTC                               |
| E- <i>HygB</i> -R (p2)                                                                             | CATCCTATCCAGATGGACATTGGAA                          |
| E- <i>HygB</i> -F (p3)                                                                             | TCGTCCGAGGGCAAAGGAATAAT                            |
| E- <i>Tr</i> -miRNA1 (p4)                                                                          | ATTGAGTGAGGAGTGACACTCTGG                           |
| <i>HygB</i> -F                                                                                     | GAGAGCTACCTTACATCAATATGGC                          |
| <i>HygB</i> -R                                                                                     | GGTACTATGGCTTAGATGGAATACCC                         |
| <i>Tr</i> -miRNA1-UF                                                                               | TCTGCCAAGTGGGCAGTTGG                               |
| <i>Tr</i> -miRNA1-UR                                                                               | GCCATATTGATGTAAGGTAGCTCTCTGCGGAGATTATTCAGCGCG      |
| <i>Tr</i> -miRNA1-DF                                                                               | GGGTATTCCATCTAAGCCATAGTACACGATATCATGGTGAAACGAGGCC  |
| <i>Tr</i> -miRNA1-DR                                                                               | CCACCACGTTCCGAACAAAGTAT                            |
| <b>Primers for OE-<i>Tr</i>-miRNA1 construction and verification</b>                               |                                                    |
| <i>Tr</i> -miRNA1-GF                                                                               | CTCAAACCTCCAAAACAACCCACATACATCTGCTAGCTGCCATCCG     |
| <i>Tr</i> -miRNA1-GR                                                                               | TCCATCATTACACCCAGTCATCCCCTGCTGGGCAAGCCGTTTATG      |
| <i>Tr</i> -miRNA1-G-DF                                                                             | TGGGATGACTGGGTGTAATGATGGA                          |
| <i>Tr</i> -miRNA1-G-DR                                                                             | ACCTAACAACTTCACAGCTCCG                             |
| Promoter- F                                                                                        | GGGTATTCCATCTAAGCCATAGTACGAGAGAAGATGGCAGTGTAGAAGGG |
| Promoter- R                                                                                        | ATGTGGGTGTTTTGGGAGTTTGAG                           |
| <i>Tr</i> -miRNA1-RT                                                                               | GTCGTATCCAGTGCAGGGTCCGAGGTATTCGCACTGGATACGACACAAGC |
| <i>Tr</i> -miRNA1-RTPCR-F                                                                          | GCGGGTTCGACTCCCG                                   |
| <i>Tr</i> -miRNA1-RTPCR-R                                                                          | AGTGCAGGGTCCGAGGTATT                               |
| <i>Tef</i> -F                                                                                      | TACAAGATCGGTGGTATTGGAAC                            |
| <i>Tef</i> -R                                                                                      | AGCTGCTCGTGGTGCATCTC                               |
| <b>Primers for <math>\Delta Trvip36</math> and OE-<i>Trvip36</i> construction and verification</b> |                                                    |
| E- <i>Trvip36</i> (p1)                                                                             | GGTTCGCTTCCGCGAGGA                                 |
| E- <i>ura3</i> -R (p2)                                                                             | CATCCAATGCAATGCATGCGAG                             |
| <i>ura3</i> -F                                                                                     | CAGTATGGTCAACTACGGTCCAGC                           |

|                                                                             |                                                   |
|-----------------------------------------------------------------------------|---------------------------------------------------|
| <i>ura3</i> -R                                                              | CGTATCTGATCAAGGAACGTTAGCG                         |
| <i>Trvip36</i> -F                                                           | ATGCGGCTCTCCTCGCTG                                |
| <i>Trvip36</i> -R                                                           | CTAGAATCTGTGGCTCTTGGTTCT                          |
| <i>Trvip36</i> -UF                                                          | ACAGGACATGGGACGAATCAGTAT                          |
| <i>Trvip36</i> -UR                                                          | GCTGGACCGTAGTTGACCATACTGGGTCACTTGGAGATCGGCACG     |
| <i>Trvip36</i> -DF                                                          | CGCTAACGTTTCCTTGATCAGATACGGGGAGATGTTGGACTCATCCAG  |
| <i>Trvip36</i> -DR                                                          | GGTTTCCTTATCGCCCGGC                               |
| Promoter-F                                                                  | GGACTGGGGTATTCCATCTAAGCCGAGAGAAGATGGCAGTGTAGAAGGG |
| Promoter-R                                                                  | CAGCGAGGAGAGCCGCATATGTGGGTGTTTTGGGAGTTTGAG        |
| <i>Trvip36</i> -RTPCR-F                                                     | ATCCACAAAGTCCTGCCTAA                              |
| <i>Trvip36</i> -RTPCR-R                                                     | CGAACCTGAATACTGTCCCT                              |
| 18S-F                                                                       | AGACAAGGCGGGCAGCAAGA                              |
| 18S-R                                                                       | GCCATCAGGGTCAGCACAGAA                             |
| <b>Primers for the construction and verification of fluorescent strains</b> |                                                   |
| E-GFP                                                                       | TGGTGCAGATGAACTTCAGGGTC                           |
| E- <i>egl</i>                                                               | ATGGTGCCCTTAACTGGATGGTAA                          |
| <i>egl</i> -F                                                               | AGAACAGGGATACCGACATCTCCA                          |
| <i>egl</i> -R                                                               | GCAGTATTGACATGCCGTTGG                             |
| <i>egl</i> -d-F                                                             | ACGAAGCCCATAGAGTAAGAAGTT                          |
| <i>egl</i> -d-R                                                             | ACATCGAGAATGACAGCGGC                              |
| E- <i>cbh</i>                                                               | CCAGGAGTTCACACTCTCTGGC                            |
| <i>cbh</i> -F                                                               | GAAGTTCATCAACGGTCAGGCC                            |
| <i>cbh</i> -R                                                               | CAGGCACTGAGAGTAGAATGGGTT                          |
| <i>cbh</i> -d-F                                                             | TTCTGATGCTAGCAAAGACGGTCAT                         |
| <i>cbh</i> -d-R                                                             | ACAGAGAACCCGGAAGTCA                               |

---
